# Supplementary material for: Quantized ferroelectricity in multivalent ion conductors with non-polar point groups
Source: Royal Society of Chemistry journal article supplement (doi:10.1039/d4mh00306c), 2024-01-01
Supplement: d4mh00306c1.pdf [file d4mh00306c1.pdf]

Electronic Supplementary Information

Quantized Ferroelectricity in Multivalent Ion Conductors with Non-Polar Point Groups

Xuechen Wang and Menghao Wu\*

*School of Physics, School of Chemistry and Institute of Theoretical Chemistry, Huazhong*

*University of Science and Technology, Wuhan, Hubei 430074, China*

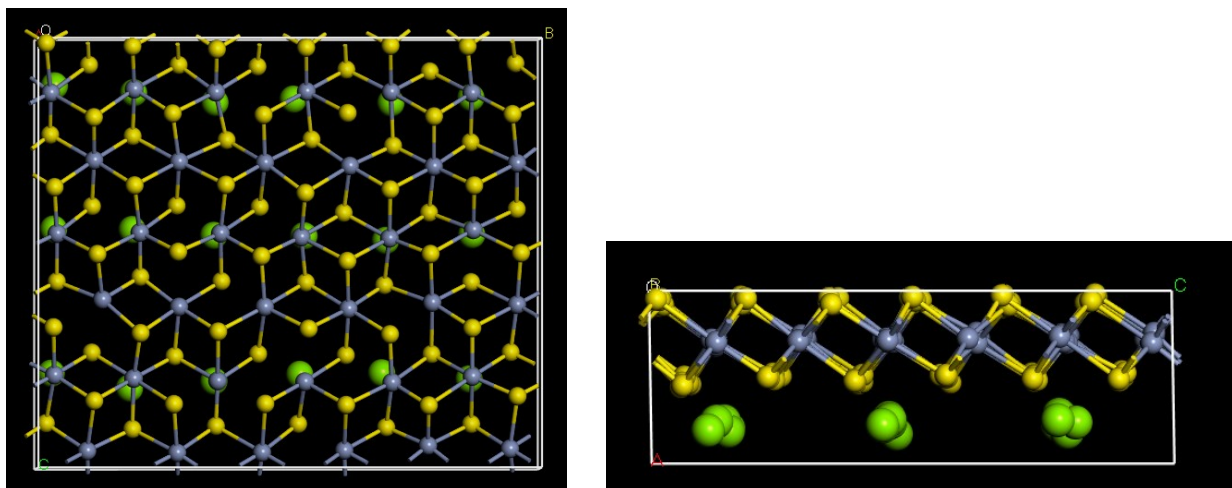

Figure S1. Snapshot of  $\text{Mg}_{0.5}\text{CrS}_2$  after AIMD simulation in the canonical ensemble at 900K for 10 ps.
